# Supplementary material for: Mesostructured Silicas as Cation-Exchange Sorbents in Packed or Dispersive Solid Phase Extraction for the Determination of Tropane Alkaloids in Culinary Aromatics Herbs by HPLC-MS/MS
Source: MDPI journal article supplement (doi:10.3390/toxins14030218), 2022-03-17
Supplement: s1 [file s1]

# Supplementary Materials: Mesostructured Silicas as Cation-Exchange Sorbents in Packed or Dispersive Solid Phase Extraction for the Determination of Tropane Alkaloids in Culinary Aromatics Herbs by HPLC-MS/MS

Lorena González-Gómez, Judith Gañán, Sonia Morante-Zarcero, Damián Pérez-Quintanilla and Isabel Sierra

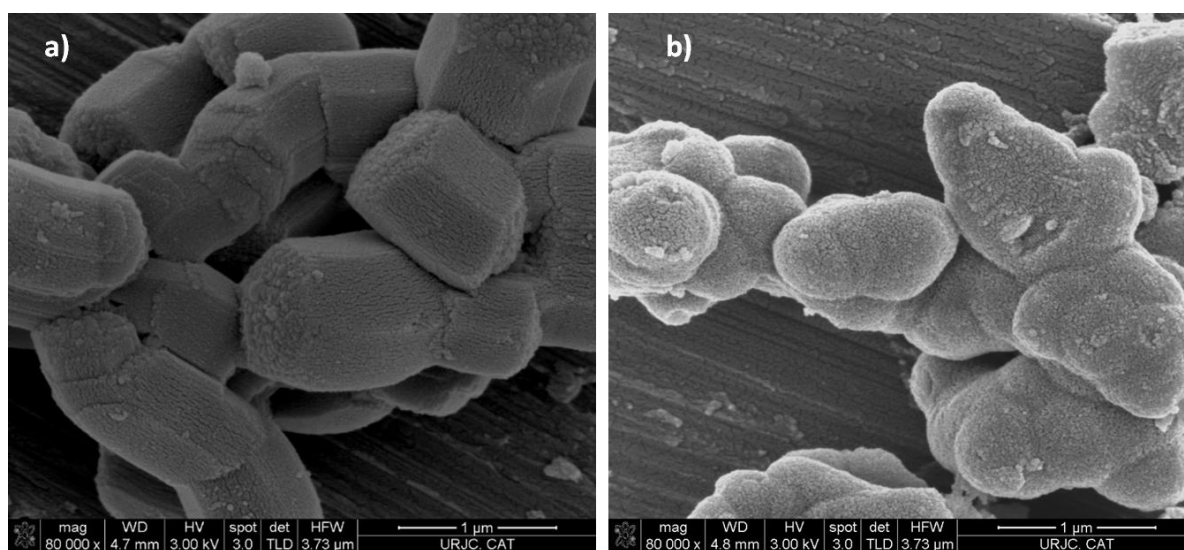

**Figure S1.** SEM images of: (a) SBA-15-SO<sub>3</sub><sup>-</sup> (80,000×) and (b) HMS-SO<sub>3</sub><sup>-</sup> (80,000×) materials.

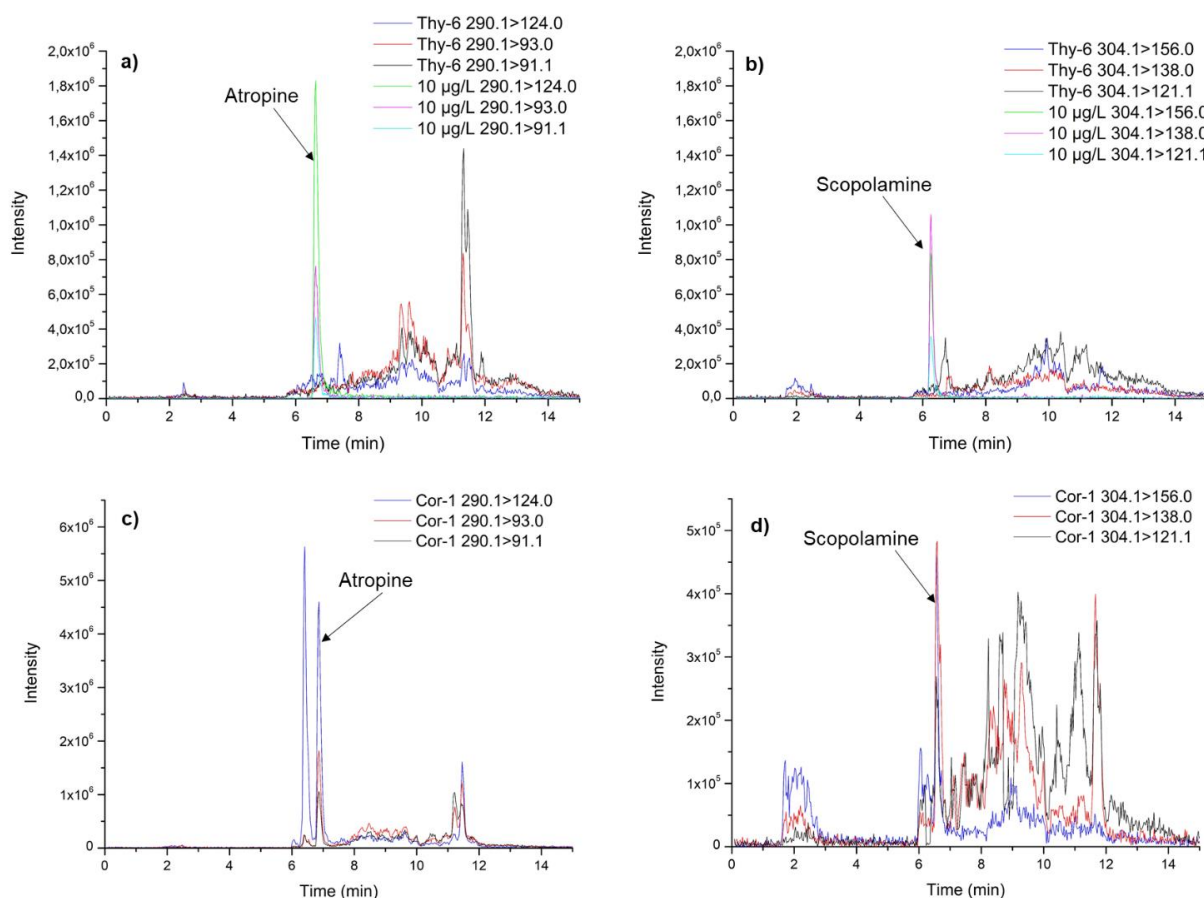

**Figure S2.** Chromatograms of different product ions: (a) atropine and (b) scopolamine in standard solution (10 µg/L) and uncontaminated thyme sample (Thy-6), (c) atropine and (d) scopolamine in contaminated coriander sample (Cor-1).

**Table S1.** Accuracy and precision of the method calculated for thyme sample.

|                                          | Level     | Atropine | Scopolamine |
|------------------------------------------|-----------|----------|-------------|
| Accuracy (recovery % ± SD) <sup>a</sup>  | 5 µg/kg   | 92 ± 6   | 92 ± 2      |
|                                          | 25 µg/kg  | 92 ± 7   | 90 ± 7      |
|                                          | 200 µg/kg | 87 ± 2   | 70 ± 4      |
| Intra-Day Precision (%RSD) <sup>b</sup>  | 5 µg/kg   | 8        | 13          |
|                                          | 25 µg/kg  | 9        | 4           |
|                                          | 200 µg/kg | 3        | 2           |
| Inter-Day Precision (% RSD) <sup>c</sup> | 5 µg/kg   | 5        | 7           |
|                                          | 25 µg/kg  | 8        | 11          |
|                                          | 200 µg/kg | 5        | 14          |

<sup>a</sup>Accuracy, expressed as recovery (%), was evaluated with six doped samples at the beginning of the process and compared with a simulated doped sample at the end. <sup>b</sup>Intra-Day Precision expressed as relative standard deviation (% RSD) for six replicates in one day ( $n = 6$ ). <sup>c</sup>Inter-Day Precision expressed as relative standard deviation (% RSD) for three replicates in three different days ( $n = 9$ ).

**Table S2.** Concentrations of atropine (At) and scopolamine (Sc) in commercial samples of thyme (Thy), basil (Ba) and coriander (Cor) with the proposed SLE-SPE-HPLC-MS/MS method.

| Code  | Origin         | At (µg/kg) | Sc (µg/kg) |
|-------|----------------|------------|------------|
| Thy-1 | Poland         | 5.7 ± 0.2  | N.D        |
| Thy-2 | Egypt/Poland   | N.D        | N.D        |
| Thy-3 | Spain          | <5         | <5         |
| Thy-4 | Spain          | <5         | N.D        |
| Thy-5 | Poland         | <5         | <5         |
| Thy-6 | Spain          | N.D        | N.D        |
| Thy-7 | Spain          | <5         | N.D        |
| Ba-1  | Poland         | 10.2 ± 0.4 | N.D        |
| Ba-2  | Not shown      | 11.7 ± 0.4 | N.D        |
| Ba-3  | Spain          | 9 ± 1      | N.D        |
| Ba-4  | Egypt          | 11 ± 3     | N.D        |
| Ba-5  | Egypt          | 11 ± 2     | N.D        |
| Cor-1 | France/Germany | 42 ± 5.0   | 34 ± 5     |
| Cor-2 | France/Germany | 10.4 ± 0.9 | N.D        |
| Cor-3 | Not shown      | 9.9 ± 0.2  | N.D        |
| Cor-4 | Poland         | 10.6 ± 0.4 | N.D        |

\*N.D Not Detected.

**Table S3.** Mass spectrum parameters for atropine (At) and scopolamine (Sc) using the developed HPLC-MS/MS method.

| Analyte | Ionization mode | Molecular weight (g/mol) | Precursor ions $m/z$ | MS <sup>2</sup> Product ions $m/z$ | Collision energy (V) | Dwell time (s) |
|---------|-----------------|--------------------------|----------------------|------------------------------------|----------------------|----------------|
| At      | ESI (+)         | 289.4                    | 290                  | 77                                 | 40                   | 0.5            |
|         |                 |                          |                      | 91                                 | 34                   |                |
|         |                 |                          |                      | 93                                 | 28                   |                |
|         |                 |                          |                      | 124*                               | 22                   |                |
| Sc      | ESI (+)         | 384.3                    | 304                  | 103                                | 36                   | 0.5            |
|         |                 |                          |                      | 121                                | 20                   |                |
|         |                 |                          |                      | 138*                               | 16                   |                |
|         |                 |                          |                      | 156                                | 14                   |                |

\* Ions used for quantification.
